# Supplementary material
Source: PubMed Central journal article supplement (PMC6727969)
Supplement: NIHMS1048141-supplement-Supplement.pdf [file NIHMS1048141-supplement-Supplement.pdf]

SUPPLEMENTARY MATERIAL

**The cytoplasm-entry domain of antibacterial CdiA is a dynamic  $\alpha$ -helical bundle with disulfide-dependent structural features**

Nicholas L. Bartelli<sup>a</sup>, Sheng Sun<sup>a</sup>, Grant C. Gucinski<sup>b</sup>, Hongjun Zhou<sup>a</sup>, Kiho Song<sup>c</sup>, Christopher S. Hayes<sup>\*b,c</sup>, Frederick W. Dahlquist<sup>\*a,b,c</sup>

<sup>a</sup>Department of Chemistry and Biochemistry, University of California, Santa Barbara, CA 93106, United States

<sup>b</sup>Department of Molecular, Cellular and Developmental Biology, University of California, Santa Barbara CA 93106, United States

<sup>c</sup>Biomolecular Science and Engineering Program, University of California, Santa Barbara, CA 93106, United States

**\*CORRESPONDING AUTHORS**

Telephone: +1 805 893-5326, E-mail: dahlquist@ucsb.edu; +1 805 893-2028, E-mail: chayas@lifesci.ucsb.edu

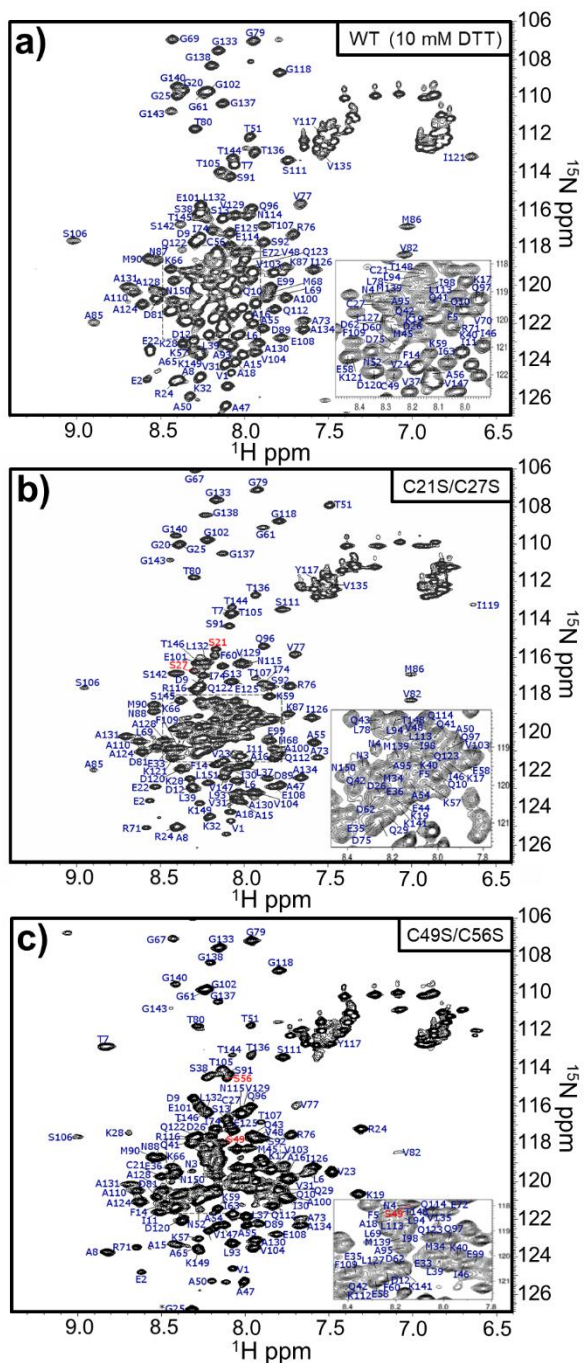

**Figure S1.  $^1\text{H}$ - $^{15}\text{N}$  HSQC amide resonance assignments.** (a) reduced CdiA-CT<sup>MHI813</sup> cytoplasm-entry domain, (b) oxidized C21S/C27S entry domain and (c) oxidized C49S/C56S entry domain. The amide resonances for the substituted Ser residues are labeled in red.

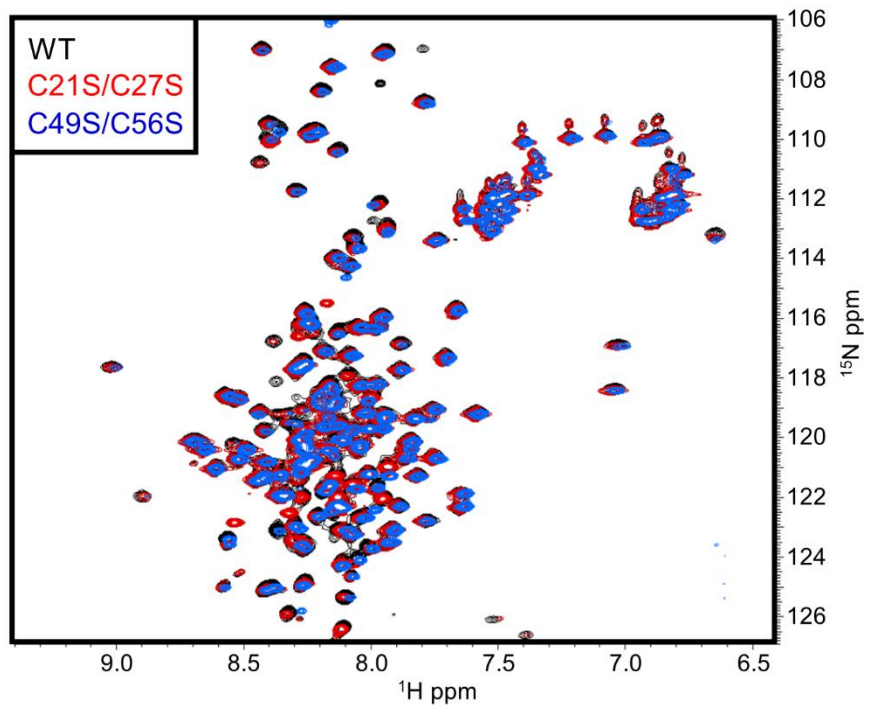

**Figure S2.** Superimposed  $^1\text{H}$ - $^{15}\text{N}$  HSQC spectra for reduced (10 mM DTT) CdiA-CT<sup>MH1813</sup> cytoplasm entry domain (black), reduced CdiA-CT<sup>MH1813</sup> C21S/C27S (red) and reduced CdiA-CT<sup>MH1813</sup> C49S/C57S (blue).

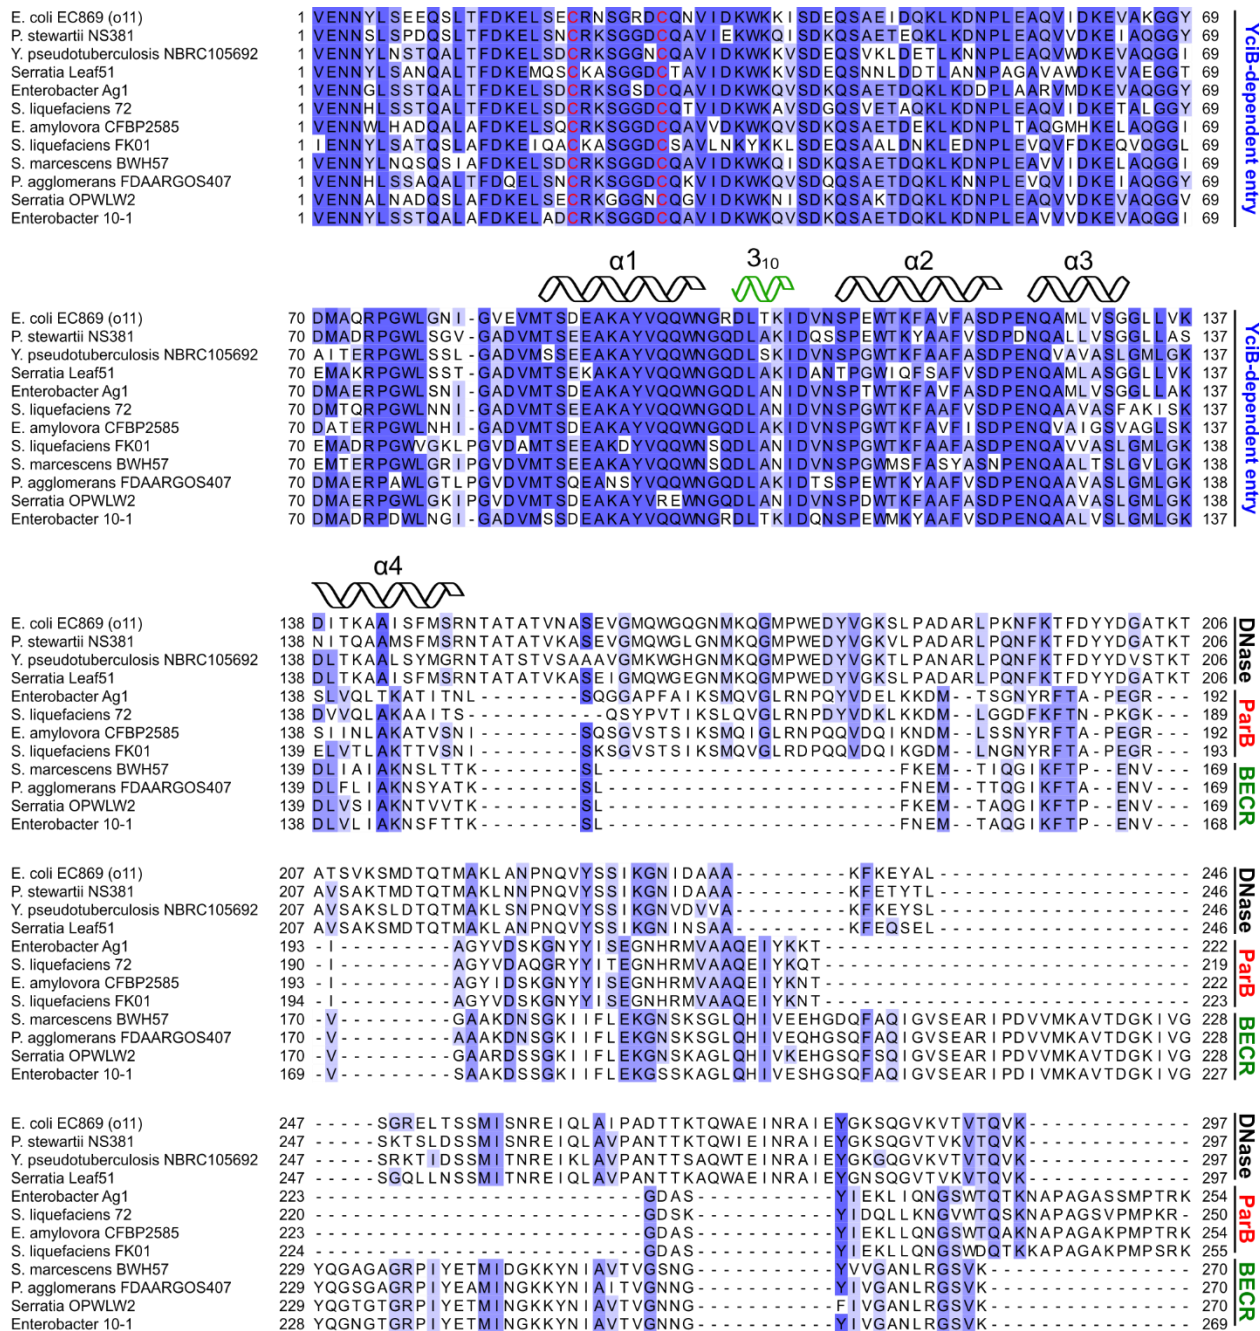

**Figure S3. Alignment of CdiA-CT regions that contain YciB-dependent cytoplasm-entry domains.**

CdiA-CT sequences from *E. coli* EC869 (o11) (NCBI reference sequence:

WP\_000245723.1), *Pantoea stewartii* NC381 (WP\_081316794.1), *Yersinia pseudotuberculosis* NBRC 105692 (WP\_024063034.1), *Serratia* sp. Leaf51 (KQN60877.1), *Enterobacter* sp. Ag1 (WP\_008454265.1), *Serratia liquefaciens* 72 (OKP23932.1), *Erwinia amylovora* CFBP 2585 (CCO85123.1), *Serratia liquefaciens* FK01 (WP\_053225543.1), *Serratia marcescens* BWH57

(WP\_060446815.1), *Pantoea agglomerans* FDAARGOS\_407 (WP\_098052973.1), *Serratia* sp. OPWLW2 (WP\_099817977.1) and *Enterobacter* sp. 10-1 (WP\_095099049.1) were aligned using Clustal omega and rendered using Jalview with residue colors set at 30% sequence identity [1]. The conserved pair of Cys residues are indicated in red font. The cytoplasm-entry, DNase, ParB and BECR domains are indicated at the right of the alignment. Secondary structure elements from the crystal structure of CdiA-CT<sub>011</sub><sup>EC869</sup> (PDB: 4G6U) are indicated above the alignment.

[1] Waterhouse AM, Procter JB, Martin DM, Clamp M, Barton GJ. Jalview Version 2--a multiple sequence alignment editor and analysis workbench. *Bioinformatics*. 2009;25:1189-91.

```

E. coli MHI813      1 VENNFLTADQIDSFAAKAKGGEVRGDCQKQIVKEMEELSLKQQQEMIAVCAITNPAAKCKEFGDIPAKGMLVREAI 74
C. amalonaticus Y19 1 VENNLSLSEDIQINGFAAKAKGGEARGDCQKQIVKEMEDLSLNQQKEMIAISVNPKAKCKEKYGDIPANGMLVRQAL 74
P. carotovorum PCC21 1 VENNLRVSOIEDFAVRAKGGQEVGDCQKQIVKEMEDLSLNQQKEMIAVCAITNPAAKCKEFGDIPANGMLVREAL 74
P. atrosepticum SCRI1043 1 VENNFLSADQITDFAARAKGGEARGDCQKQIVKEMEDLSLKQRNELIVTCAASDAACCKEKYGDIPANSMLVHEAI 74
Y. kristensenii FCF580 1 VENNYSATQIDDFAAARAKGGEARGDCQKQIVKEMEDLSLKQRNELIVTCAASDAAVCKEKYGDIPANSMLVHEAI 74
Erwinia Leaf53      1 VENNYLRAQDLDFAAKAQGGQKRGDCDAVRKEMQTL SLKQQDQLVAVCATDPTACKANFGDVAANGMLVREAI 74
A. xylosoxidans NH44784 1 VENNNLNAPQLDFEAERARGGARGDCQHVIEEMERLSVAQQDRLISVCAITNPAAKCKEYGDIPANSMLIRDAI 74

E. coli MHI813      75 DRVLG-TDVP SAMKNDMSLLAQQIEAEGVVTSTEFASQLQNRYGIDKQQAELI LVAALGAVTGGMGKSGTSTV 147
C. amalonaticus Y19 75 DQLFD-ADVP SEMKNDISSFWAQQMEAEVGVVTSTEFASQLENRYGMDKQQSEILAMAVLGAVTGGMGKAGASTS 147
P. carotovorum PCC21 75 DRLFD-ADVP SQMKNDISSFWAQQMEAEVGVVTSTEFASQLQSRYGIDKQQAELI LAGAVTGGMGKSGKGTSE 147
P. atrosepticum SCRI1043 75 DKALG-EDIPWSMKNDLSVLLMQQIDESGIVNSTEFAQQLQTL YGLDSQKAEILAGVAMAAVTGGMGKAGKPSQ 147
Y. kristensenii FCF580 75 DRALG-EDIPWSMKNDLSVLLMQQIDESGIVNSTEFAQQLQTL YGLDSQKAEILAGVAMAAVTGGMGKGGKSGAM 147
Erwinia Leaf53      75 DRVLGNDDVPWQMKSDMSALYAQQIEAEGVVSSTEFARQLQSRYGIDEQRAQLLAGAALSAMSGGI KLGGRSPA 148
A. xylosoxidans NH44784 75 DRVLGDSDI PWQMKADMGPLLSQQIDAEGVVSSTEFARLARTY GIDKERAELLSGAVLGAITGGVGGKGSIPA 148

E. coli MHI813      148 TKNIVVVNSGKKGAWNQAMNKPEP-N-----TIYKVDG--N---KTFQTDALGRTSSVEGILVA 200
C. amalonaticus Y19 148 GKTISA----KPEWLQNV-----Q-----AGNKFNAEQS---KNYPYN-----ELYV 182
P. carotovorum PCC21 148 NS-VKN----PVRFIEGVKVKDI-K-----TGQTFSGTVD---LKPTLDRI-----ASGGAYP 191
P. atrosepticum SCRI1043 148 ANTTKLPNGQQVNHYEASLVGLPPGERVAQVKQMASSVAQSNQWAKDNKLT---KMNNRDVYRS---SDGNLYA 215
Y. kristensenii FCF580 148 PVP IPTKAGNGL-VYQSNQ-KHTPGQ-----VGYNRRNAGTE---PTNSIQLFGNSVENGGKKRYA 201
Erwinia Leaf53      149 AVSSGGKQ---ASTATGSGKGT T TGSATG---SSGSGTA-GNCGGSSNGSSTGGTPATPATSEAALPLGGKNNQM 216
A. xylosoxidans NH44784 149 KSHSVHGK---AGEDHKENVRYPNKDAVQ---KAAE-----FL 181

E. coli MHI813      201 SKSDRNTYQQ----CKAGKCGSSGDEGGHLIASIFN-----GPGKLNLPMDGNLN 248
C. amalonaticus Y19 183 NKPNGNGYR----VDSYN----PATGEIVSRKFTQFADITEATATSYIREAVNKYPAGASIAQVPSSGALG 246
P. carotovorum PCC21 192 HRNDGT VFKN----LPD-----RGTGKIGL-----PSQPIGYKYYVHPT-----227
P. atrosepticum SCRI1043 216 LDTQHGRFELVN---AKNGKHQ---GEVDMGLKFI---EGSKDTS-----GGHDL 256
Y. kristensenii FCF580 202 LDEKDNVHQFTN---TNDGSHWWSGSTGDASVPLKKS---DIPNAVK-----KEFGL 247
Erwinia Leaf53      217 NQPKNPSYQPVNRQSTVGNREYSGHALDRMQD-----249
A. xylosoxidans NH44784 182 ---ERPFGSEIKDASRKT SQHYHGQTVYQAD-----210

E. coli MHI813      249 KGVWK-----QMENTWANALKDGKQVNVKIEPVYTGENKRPDSFSVTYSIDGGRPVIKDISNAPGGVK 311
C. amalonaticus Y19 247 GKQLQGSNILEIPPQIKPI PQSVLDSAKQSNVIRDTNGKVK-----289
P. carotovorum PCC21 228 -----PNISGPGPQR-----IVGQSGEAYYTNDHYKTFIKIR-----260
P. atrosepticum SCRI1043 257 KVK-----259
Y. kristensenii FCF580 248 PGKWR-----252
Erwinia Leaf53      250 ---RGIMPSVVENTIKTGAATSSRG-----NTTVYDATNNVSVVTNSSGKVVTVKY---GK---300
A. xylosoxidans NH44784 211 ---R-----RIGNNIRKGDKFYLDG-THM-----DHI EVFDKHNFRYVNLNLDG SVNDRKTRAARGRSLK 266

```

**Figure S4. Alignment of CdiA-CT regions that contain MetI-dependent cytoplasm-entry domains.** CdiA-CT sequences from *E. coli* MHI813 (WP\_001383049.1), *Citrobacter amalonaticus* Y19 (WP\_052746947.1), *Pectobacterium carotovorum* PCC21 (WP\_014915291.1), *Pectobacterium atrosepticum* SCRI1043 (WP\_011093679.1), *Yersinia kristensenii* FCF580 (CNL55446.1), *Erwinia* sp. Leaf53 (WP\_056235768.1), and *Achromobacter xylosoxidans* NH44784-1996 (WP\_020924618.1) were aligned using Clustal omega and rendered using Jalview with residue colors set at 30% sequence identity [1]. Conserved Cys residues corresponding to Cys21, Cys27, Cys49 and Cys56 of CdiA-CT<sup>MHI813</sup> are indicated in red font.

[1] Waterhouse AM, Procter JB, Martin DM, Clamp M, Barton GJ. Jalview Version 2--a multiple sequence alignment editor and analysis workbench. *Bioinformatics*. 2009;25:1189-91.

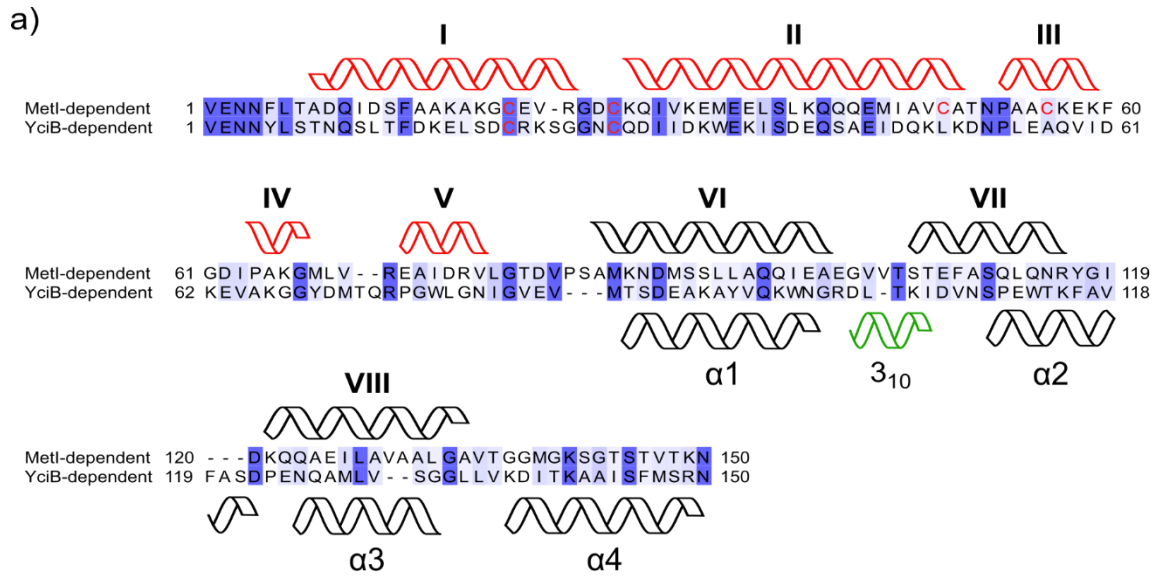

b)

MetI-dependent 1 VENNFLTADQIDSFAAKAKGC-EVRGDCQKQIIVKEME-ELSLKQQQEMIAVCA 49  
RbsC-dependent 1 VENNFLNKGRPVA-FAEKLKAC-NGEPSCEQ---GVRKDMAKESAENIQKLKSCW 50  
YciB-dependent 1 VENNYLSTNQSLT-FDKELSDPRKSGGNQDIIIDKWE-KISDEQSAEIDQKLDN 51  
PtsG-dependent 1 VENNYLSVSEKTE-LEIAKQKLKNSKDPAREKAQKQYDALL EKDISDKAVITAC 55  
GltJK-dependent 1 VENNALASRNLDG CRTLSPEAAGKAKELSQRIIDKGLPS---VEDMRGKLASC 50  
FtsH-dependent 1 VENNALL-----SLVARGC-AVAAPCRT-----KVAEQLLEIGAKAGMAG----- 38

MetI-dependent 50 ATNPA-----A---CKEKFGD-IPAKGMLVREAIIDRVLGTD-----VP 83  
RbsC-dependent 51 DAGDS-----A---CVAAMRSQIETD GKAY-----SQLGVQ----- 78  
YciB-dependent 52 -DNPL-----EAQVIDKEVAKGGYDMTQRPGWLGNI GVEVMTSDEA 91  
PtsG-dependent 56 SNGQA-----ASAA CAGERLKVIAAKGGYETGHYNNQVSDM-----YP 93  
GltJK-dependent 51 QDDSCRKGVWTEYRQASDA-TINSLKQMALNGEL SREELAFINHELKELAVSGYR 105  
FtsH-dependent 39 -----DELEHLITLQMMGN-DE-ITTKYLLS-----LHDKYSGSAA 87

MetI-dependent 84 SAMKNDMSLLAQQIEAEGVV-TSTEFASQ-----LQNR Y---G 118  
RbsC-dependent 79 DA-----L---AGRSYE-NSANWYAD-----IIDQC GKCG 105  
YciB-dependent 92 KAYVQKWNGRDLTKIDVN-----SPEWTKF-----AVFAS--DPE 124  
PtsG-dependent 94 DAYGQIVNLLNITSVDAQNQVQKQVVDAMVNY-----AMVQFVDRA 133  
GltJK-dependent 106 A-----NDKIGRS---EQSSWLNGGSGPLSGFFNTELRQKELEKSLSKA 147  
FtsH-dependent 54 -----DELEHLITLQMMGN-DE-ITTKYLLS-----LHDKYSGSAA 87

MetI-dependent 119 I-----DKQQAELI LAVAALGAVTGGMGKSGTSTV-----TKN----- 150  
RbsC-dependent 106 WLESALT KTAADGLT-----DAVYGALGA----- 129  
YciB-dependent 125 N-QAML-----VSGLL-----VKDITKAASIFM-----SRN----- 150  
PtsG-dependent 134 TAQAYVE--TYDGMKVVAASMAPVIGAAAASKIEVL----- 167  
GltJK-dependent 148 DAAQYVKEEQRNLLLETA-V----- 167  
FtsH-dependent 88 SNP-NIGKD-----LT-----DAEKVELGGSGSGTGTPPPSSENDPKQQNEKTVDK 131

**Figure S5. Comparison of characterized CdiA cytoplasm-entry domains. (a)** The MetI- and

YciB-dependent entry domains from CdiA-CT<sup>MHI813</sup> and CdiA-CT<sub>011</sub><sup>EC869</sup> (respectively) were aligned using Clustal omega. The paired Cys residues in each domain are shown in red font.

Secondary structure elements are indicated above and below the domain sequences. The

disulfide-dependent helices of CdiA-CT<sup>MHI813</sup> are rendered in red. (b) CdiA cytoplasm entry

domains contain paired Cys residues. Six characterized entry domains from *E. coli* MHI813

(WP\_001383049.1), *Dickey dadantii* 3937 (WP\_013318031.1), *E. coli* EC869 (o11) (WP\_000245723.1), *E. coli* 3006 (EKI34460.1), *Photobacterium luminescens* TT01 (WP\_011144930.1) and *E. coli* 536 (WP\_000554175.1) were aligned using Clustal omega and rendered using Jalview with residue colors set at 30% sequence identity [1]. Cys residues are shown in red font.

[1] Waterhouse AM, Procter JB, Martin DM, Clamp M, Barton GJ. Jalview Version 2--a multiple sequence alignment editor and analysis workbench. *Bioinformatics*. 2009;25:1189-91.



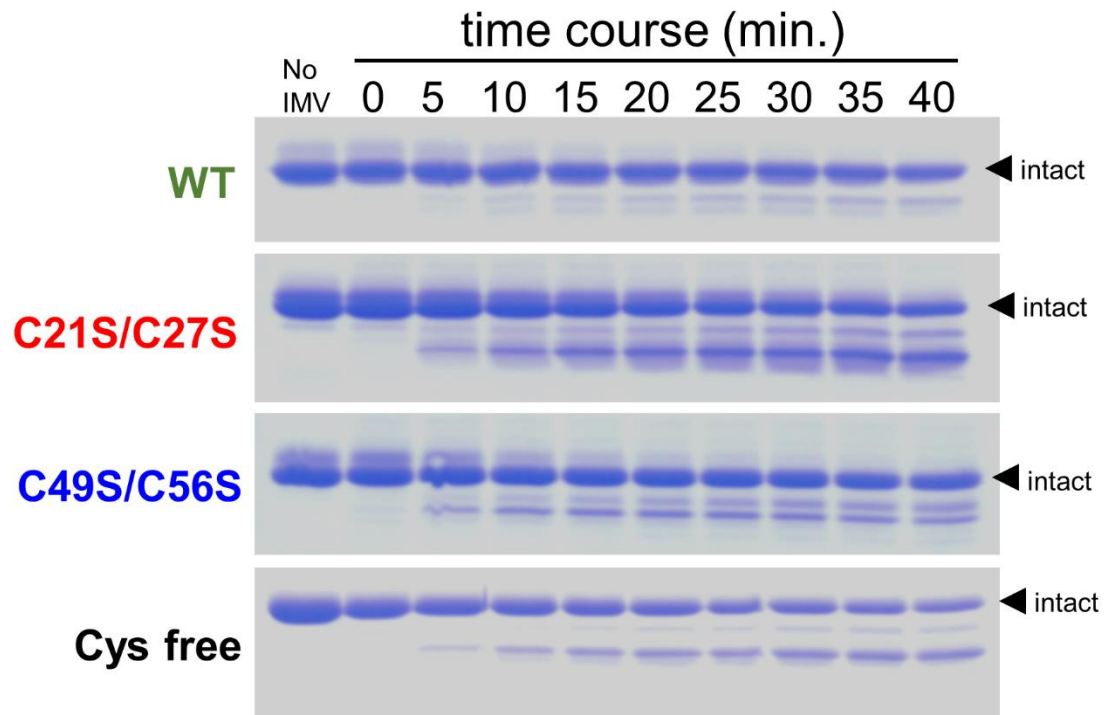

**Figure S6. Effect of CdiA-CT<sup>MHI813</sup> cytoplasm entry domain disulfide formation on protease sensitivity**

Purified and oxidized CdiA-CT<sup>MHI813</sup> cytoplasm entry domain was combined with vesicles isolated from the inner membrane of *E. coli* (IMV). The IMVs exhibit protease activity on the CdiA-CT<sup>MHI813</sup> cytoplasm entry domain. Samples were removed every 5 minutes and the reaction was quenched via non-reducing SDS-PAGE loading buffer. Protease activity was assessed via SDS-PAGE. The specific CdiA-CT<sup>MHI813</sup> cytoplasm entry domain employed in each experiment is indicated to the left of each gel image.

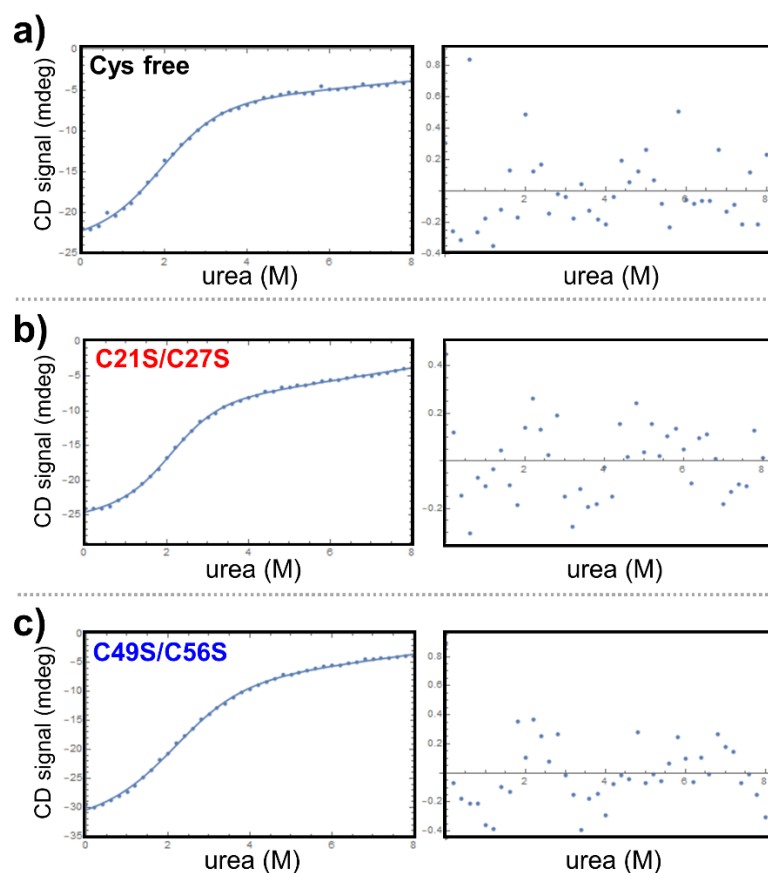

**Figure S7. Nonlinear curve fitting of circular dichroism data**

Fits and residuals of the observed change in circular dichroism (CD) at 224 nm using a two state model for **a)** Cys free, **b)** oxidized C21S/C27S and **c)** oxidized C49S/C56S CdiA-CT<sup>MH1813</sup> cytoplasm entry domain. We employed the following function:

$$\text{func}[\text{urea}] = (\text{cdf1} + u1 \cdot \text{urea}) \frac{\text{Exp}[(g - m \cdot \text{urea}^2)]}{(1 + \text{Exp}[(g - m \cdot \text{urea}]])} + (\text{cdu} + u \cdot \text{urea}) \frac{1}{(1 + \text{Exp}[(g - m \cdot \text{urea}]])}$$

Where  $\text{cdf1}$  is the CD intensity of the folded state,  $u1$  is the urea dependence of the CD intensity of the folded state,  $g$  is the free energy difference in units of  $RT$  between the unfolded and folded states in the absence of urea and  $m$  is the dependence of the free energy difference on urea in units of  $RT/\text{Molar}$ .

As can be seen in the overlays of the data (points and fit (solid line) in **Figure S7a, b, & c**, the fits to the two state model are quite good. The residual values are about 2% of the observed and fit values. Visual examination of the residuals suggests some apparent oscillatory quality to the residuals as a function of urea. At least some of this oscillatory pattern in the residual plots reflects the nonlinear fitting procedure we used, the NonLinearModelFit routine in Mathematica.

**Table S1. Plasmids**

| <b>Plasmid</b> | <b>Description<sup>a</sup></b>                                                                                                                                                                                                      | <b>Reference</b> |
|----------------|-------------------------------------------------------------------------------------------------------------------------------------------------------------------------------------------------------------------------------------|------------------|
| pCH9591        | pZS21:: <i>bamA</i> <sup>ECL</sup> , Kan <sup>R</sup>                                                                                                                                                                               | [1]              |
| pCH9604        | pZS21:: <i>bamA</i> <sup>Eco</sup> , Kan <sup>R</sup>                                                                                                                                                                               | [1]              |
| pCH10163       | Cosmid pCdiA-CT/ <i>pheS</i> * that carries a <i>kan-pheS</i> * cassette in place of the <i>E. coli</i> EC93 <i>cdiA-CT/cdiI</i> coding sequence. Used for allelic exchange and counter-selection. Cm <sup>R</sup> Kan <sup>R</sup> | [2]              |
| pCH11446       | Expresses chimeric <i>cdiA</i> <sup>EC93</sup> -CT <sup>MHI813</sup> , Cm <sup>R</sup>                                                                                                                                              | [3]              |
| pCH12234       | pET21d:: <i>cdiA-CT(V1-N150)</i> <sup>MHI813</sup> , Amp <sup>R</sup>                                                                                                                                                               | This study       |
| pCH13443       | Expresses chimeric <i>cdiA(C21S/C27S)</i> <sup>MHI813</sup> , Cm <sup>R</sup>                                                                                                                                                       | This study       |
| pCH13736       | Expresses chimeric <i>cdiA(C27S/C49S/C56S)</i> <sup>MHI813</sup> , Cm <sup>R</sup>                                                                                                                                                  | This study       |
| pCH13737       | Expresses chimeric <i>cdiA(C21S/C27S/C49S/C56S)</i> <sup>MHI813</sup> , Cm <sup>R</sup>                                                                                                                                             | This study       |
| pCH13794       | pET21d:: <i>cdiA-CT(V1-N150/C21S/C27S)</i> <sup>MHI813</sup> , Amp <sup>R</sup>                                                                                                                                                     | This study       |
| pCH13814       | Expresses chimeric <i>cdiA(C21S/C27S/C56S)</i> <sup>MHI813</sup> , Cm <sup>R</sup>                                                                                                                                                  | This study       |
| pCH14122       | Expresses chimeric <i>cdiA(C49S/C56S)</i> <sup>MHI813</sup> , Cm <sup>R</sup>                                                                                                                                                       | This study       |
| pCH15122       | pET21d:: <i>cdiA-CT(V1-N150/C21S/C27S/C49S/C56S)</i> <sup>MHI813</sup> , Amp <sup>R</sup>                                                                                                                                           | This study       |
| pCH15123       | pET21d:: <i>cdiA-CT(V1-N150/C49S/C56S)</i> <sup>MHI813</sup> , Amp <sup>R</sup>                                                                                                                                                     | This study       |

<sup>a</sup>Abbreviations: Amp<sup>R</sup>, ampicillin-resistance; Cm<sup>R</sup>, chloramphenicol-resistance; Kan<sup>R</sup>, kanamycin-resistance.

[1] Ruhe ZC, Wallace AB, Low DA, Hayes CS. Receptor polymorphism restricts contact-dependent growth inhibition to members of the same species. *MBio*. 2013;4.

- [2] Morse RP, Nikolakakis KC, Willett JL, Gerrick E, Low DA, Hayes CS, et al. Structural basis of toxicity and immunity in contact-dependent growth inhibition (CDI) systems. *Proc Natl Acad Sci U S A*. 2012;109:21480-5.
- [3] Willett JL, Gucinski GC, Fatherree JP, Low DA, Hayes CS. Contact-dependent growth inhibition toxins exploit multiple independent cell-entry pathways. *Proc Natl Acad Sci U S A*. 2015;112:11341-6.

**Table S2. Oligonucleotides**

| Identifier | Oligonucleotide     | Sequence                                                                               | Reference  |
|------------|---------------------|----------------------------------------------------------------------------------------|------------|
| CH3174     | MHI813-CT(OE)-for   | 5' - CAG GTA GGA ACT CGG TTG AGA ATA<br>ATT TTT TGA CCG CAG ATC AGA TCG ATA<br>GC      | [1]        |
| CH3175     | MHI813-CT(OE)-rev   | 5' - GGT CTG GTG TCT AAC CTT TGG GTT<br>ATA GTT CAT CAT CAT ATT GAA AGT TTA<br>TGC TAA | [1]        |
| CH3734     | MHI813-N150-Xho-rev | 5' - CAC <u>CTC GAG</u> GTT TTT AGT TAC C                                              | This study |
| CH4041     | MHI813-C21A-rev     | 5' - AGC CCC TTT CGC TTT TGC C                                                         | This study |
| CH4052     | MHI813-C27A-for     | 5' - GCC AAA CAG ATT GTA AAG GAG ATG<br>G                                              | This study |
| CH4053     | MHI813-C49A-rev     | 5' - GGC GAC AGC TAT CAT TTC CTG C                                                     | This study |
| CH4054     | MHI813-C56A-rev     | 5' - GGC GGC TGC AGG GTT TGT TG                                                        | This study |
| CH4211     | MHI813-Nco-for      | 5' - <u>GAC CAT GGT</u> TGA GAA TAA CTT TTT<br>GAC CGC                                 | This study |
| DL1527     | EC93-upstream-for   | 5' - GAA CAT CCT GGC ATG AGC G                                                         | [2]        |
| DL1663     | EC93-downstream-for | 5' - CCC AAA GGT TAG ACA CCA GAC C                                                     | [2]        |
| DL2368     | EC93-downstream-rev | 5' - GTT GGT AGT GGT GGT GCT G                                                         | [3]        |
| DL2470     | EC93-upstream-rev   | 5' - ATT ATT CTC AAC CGA GTT CCT ACC<br>TG                                             | [3]        |

[1] Willett JL, Gucinski GC, Fatherree JP, Low DA, Hayes CS. Contact-dependent growth inhibition toxins exploit multiple independent cell-entry pathways. *Proc Natl Acad Sci U S A*. 2015;112:11341-6.

[2] Poole SJ, Diner EJ, Aoki SK, Braaten BA, t'Kint de Roodenbeke C, Low DA, et al. Identification of functional toxin/immunity genes linked to contact-dependent growth inhibition (CDI) and rearrangement hotspot (Rhs) systems. *PLoS Genet*. 2011;7:e1002217.

[3] Morse RP, Nikolakakis KC, Willett JL, Gerrick E, Low DA, Hayes CS, et al. Structural basis of toxicity and immunity in contact-dependent growth inhibition (CDI) systems. *Proc Natl Acad Sci U S A*. 2012;109:21480-5.

**Table S3: Selected CdiA-CT NMR resonance data**

| WT (10 mM DTT) |      |                      |                       |                          | C21S/C27S (oxidized) |      |                      |                       |                          | C49S/C56S (oxidized) |      |                      |                       |                          |
|----------------|------|----------------------|-----------------------|--------------------------|----------------------|------|----------------------|-----------------------|--------------------------|----------------------|------|----------------------|-----------------------|--------------------------|
| No.            | Res. | Amide <sup>1</sup> H | Amide <sup>15</sup> N | <sup>13</sup> C $\alpha$ | No.                  | Res. | Amide <sup>1</sup> H | Amide <sup>15</sup> N | <sup>13</sup> C $\alpha$ | No.                  | Res. | Amide <sup>1</sup> H | Amide <sup>15</sup> N | <sup>13</sup> C $\alpha$ |
| 1              | Val  | 8.08                 | 124.6                 | 62.5                     | 1                    | Val  | 8.09                 | 124.6                 | 62.5                     | 1                    | Val  | 8.08                 | 124.6                 | 62.5                     |
| 2              | Glu  | 8.58                 | 125.0                 | 56.3                     | 2                    | Glu  | 8.57                 | 123.6                 | 56.7                     | 2                    | Glu  | 8.62                 | 124.8                 | 56.6                     |
| 3              | Asn  | 8.54                 | 120.2                 | 53.2                     | 3                    | Asn  | 8.34                 | 119.5                 | 53.2                     | 3                    | Asn  | 8.32                 | 119.5                 | 53.2                     |
| 4              | Asn  | 8.36                 | 119.2                 | 53.3                     | 4                    | Asn  | 8.28                 | 119.1                 | 53.3                     | 4                    | Asn  | 8.13                 | 117.9                 | 53.7                     |
| 5              | Phe  | 8.09                 | 119.7                 | 57.7                     | 5                    | Phe  | 8.11                 | 119.7                 | 57.8                     | 5                    | Phe  | 8.25                 | 118.5                 | 58.3                     |
| 6              | Leu  | 8.03                 | 122.6                 | 55.0                     | 6                    | Leu  | 8.05                 | 122.5                 | 55.0                     | 6                    | Leu  | 7.64                 | 119.6                 | 54.0                     |
| 7              | Thr  | 8.06                 | 113.6                 | 61.3                     | 7                    | Thr  | 8.08                 | 113.6                 | 61.3                     | 7                    | Thr  | 8.84                 | 112.8                 | 60.7                     |
| 8              | Ala  | 8.39                 | 125.0                 | 53.6                     | 8                    | Ala  | 8.41                 | 125.0                 | 53.6                     | 8                    | Ala  | 8.82                 | 123.8                 | 55.5                     |
| 9              | Asp  | 8.26                 | 117.5                 | 55.0                     | 9                    | Asp  | 8.27                 | 117.5                 | 55.1                     | 9                    | Asp  | 8.31                 | 115.6                 | 56.7                     |
| 10             | Gln  | 8.01                 | 119.7                 | 56.4                     | 10                   | Gln  | 8.02                 | 119.7                 | 56.4                     | 10                   | Gln  | 7.78                 | 120.8                 | 58.4                     |
| 11             | Ile  | 8.01                 | 121.2                 | 62.2                     | 11                   | Ile  | 8.03                 | 121.2                 | 62.3                     | 11                   | Ile  | 8.51                 | 121.6                 | 65.4                     |
| 12             | Asp  | 8.30                 | 122.9                 | 54.9                     | 12                   | Asp  | 8.32                 | 122.9                 | 55.0                     | 12                   | Asp  | 8.21                 | 120.7                 | 57.1                     |
| 13             | Ser  | 8.13                 | 116.5                 | 59.6                     | 13                   | Ser  | 8.14                 | 116.5                 | 59.6                     | 13                   | Ser  | 8.11                 | 116.7                 | 61.4                     |
| 14             | Phe  | 8.17                 | 121.6                 | 59.0                     | 14                   | Phe  | 8.18                 | 121.7                 | 59.0                     | 14                   | Phe  | 8.48                 | 121.2                 | 62.5                     |
| 15             | Ala  | 8.01                 | 123.7                 | 53.3                     | 15                   | Ala  | 8.03                 | 123.6                 | 53.3                     | 15                   | Ala  | 8.41                 | 123.4                 | 55.1                     |
| 16             | Ala  | 7.98                 | 121.6                 | 53.2                     | 16                   | Ala  | 7.98                 | 121.6                 | 53.2                     | 16                   | Ala  | 7.76                 | 119.8                 | 54.7                     |
| 17             | Lys  | 7.95                 | 119.3                 | 56.7                     | 17                   | Lys  | 7.96                 | 119.4                 | 56.6                     | 17                   | Lys  | 7.89                 | 119.0                 | 58.7                     |
| 18             | Ala  | 8.05                 | 124.1                 | 52.8                     | 18                   | Ala  | 8.09                 | 124.2                 | 52.8                     | 18                   | Ala  | 8.23                 | 118.6                 | 53.7                     |
| 19             | Lys  | 8.13                 | 120.0                 | 56.7                     | 19                   | Lys  | 8.19                 | 120.4                 | 56.3                     | 19                   | Lys  | 7.32                 | 120.7                 | 58.3                     |
| 20             | Gly  | 8.37                 | 109.7                 | 45.5                     | 20                   | Gly  | 8.40                 | 109.9                 | 45.5                     | 20                   | Gly  | 9.29                 | 114.5                 | 46.0                     |
| 21             | Cys  | 8.16                 | 118.4                 | 58.4                     | 21                   | Ser  | 8.18                 | 115.5                 | 58.6                     | 21                   | Cys  | 8.50                 | 119.7                 | 58.6                     |
| 22             | Glu  | 8.56                 | 123.4                 | 56.8                     | 22                   | Glu  | 8.54                 | 122.8                 | 56.8                     | 22                   | Glu  | MR                   | MR                    | 60.3                     |
| 23             | Val  | 8.18                 | 121.7                 | 62.4                     | 23                   | Val  | 8.13                 | 121.5                 | 62.5                     | 23                   | Val  | 7.48                 | 119.5                 | 64.6                     |
| 24             | Arg  | 8.42                 | 125.1                 | 56.0                     | 24                   | Arg  | 8.41                 | 125.0                 | 55.8                     | 24                   | Arg  | 7.31                 | 117.2                 | 58.2                     |
| 25             | Gly  | 8.40                 | 109.9                 | 45.4                     | 25                   | Gly  | 8.40                 | 110.0                 | 45.4                     | 25                   | Gly  | 8.32                 | 126.8                 | 45.7                     |
| 26             | Asp  | 8.28                 | 120.1                 | 54.1                     | 26                   | Asp  | 8.25                 | 120.2                 | 54.1                     | 26                   | Asp  | 8.21                 | 117.6                 | 52.8                     |
| 27             | Cys  | 8.31                 | 119.5                 | 58.9                     | 27                   | Ser  | 8.30                 | 116.7                 | 59.1                     | 27                   | Cys  | 8.10                 | 117.0                 | 57.8                     |
| 28             | Lys  | 8.37                 | 123.1                 | 56.9                     | 28                   | Lys  | 8.33                 | 122.4                 | 57.0                     | 28                   | Lys  | 8.70                 | 117.4                 | 59.2                     |
| 29             | Gln  | MR                   | MR                    | 56.2                     | 29                   | Gln  | 8.23                 | 120.8                 | 56.4                     | 29                   | Gln  | 7.80                 | 120.5                 | 58.5                     |
| 30             | Ile  | 8.13                 | 122.3                 | 61.6                     | 30                   | Ile  | 8.10                 | 121.9                 | 61.8                     | 30                   | Ile  | 7.75                 | 120.9                 | 64.5                     |
| 31             | Val  | 8.11                 | 124.2                 | 63.0                     | 31                   | Val  | 8.06                 | 123.5                 | 63.3                     | 31                   | Val  | 7.74                 | 119.9                 | 66.5                     |
| 32             | Lys  | 8.26                 | 124.9                 | 57.0                     | 32                   | Lys  | 8.22                 | 124.5                 | 57.3                     | 32                   | Lys  | 7.81                 | 120.4                 | 58.9                     |
| 33             | Glu  | MR                   | MR                    | MR                       | 33                   | Glu  | 8.46                 | 120.8                 | 57.8                     | 33                   | Glu  | 8.05                 | 120.0                 | 59.4                     |
| 34             | Met  | MR                   | MR                    | MR                       | 34                   | Met  | 8.28                 | 119.7                 | 56.8                     | 34                   | Met  | 8.00                 | 119.9                 | 59.2                     |
| 35             | Glu  | MR                   | MR                    | MR                       | 35                   | Glu  | 8.29                 | 121.0                 | 57.9                     | 35                   | Glu  | 8.37                 | 120.7                 | 59.3                     |
| 36             | Glu  | MR                   | MR                    | 57.6                     | 36                   | Glu  | 8.25                 | 120.3                 | 57.6                     | 36                   | Glu  | 8.41                 | 119.5                 | 59.3                     |
| 37             | Leu  | 8.14                 | 122.2                 | 56.2                     | 37                   | Leu  | 8.04                 | 121.7                 | 56.1                     | 37                   | Leu  | 7.99                 | 121.9                 | 57.5                     |
| 38             | Ser  | 8.28                 | 116.2                 | 59.3                     | 38                   | Ser  | 8.42                 | 116.8                 | 59.2                     | 38                   | Ser  | 8.21                 | 114.4                 | 61.6                     |

|    |     |      |       |      |    |     |      |       |      |    |     |      |       |      |
|----|-----|------|-------|------|----|-----|------|-------|------|----|-----|------|-------|------|
| 39 | Leu | 8.12 | 123.1 | 56.7 | 39 | Leu | 8.30 | 123.0 | 57.8 | 39 | Leu | 7.98 | 120.4 | 57.7 |
| 40 | Lys | 8.06 | 120.3 | 57.8 | 40 | Lys | 8.11 | 119.5 | 58.9 | 40 | Lys | 7.94 | 120.0 | 59.1 |
| 41 | Gln | 8.13 | 119.5 | 57.4 | 41 | Gln | 8.02 | 118.8 | 58.4 | 41 | Gln | 8.32 | 118.0 | 58.6 |
| 42 | Gln | 8.28 | 120.1 | 57.3 | 42 | Gln | 8.38 | 120.1 | 58.9 | 42 | Gln | 8.40 | 121.3 | 58.7 |
| 43 | Gln | MR   | MR    | MR   | 43 | Gln | 8.27 | 118.3 | 58.6 | 43 | Gln | 7.96 | 117.5 | 57.9 |
| 44 | Glu | MR   | MR    | MR   | 44 | Glu | 8.14 | 120.3 | 58.8 | 44 | Glu | MR   | MR    | 58.1 |
| 45 | Met | 8.29 | 120.0 | 56.4 | 45 | Met | MR   | MR    | 58.2 | 45 | Met | 7.91 | 118.8 | 57.1 |
| 46 | Ile | 7.93 | 120.9 | 61.9 | 46 | Ile | 7.99 | 119.5 | 64.5 | 46 | Ile | 7.91 | 120.4 | 62.5 |
| 47 | Ala | 8.11 | 126.4 | 52.9 | 47 | Ala | 7.80 | 122.8 | 54.9 | 47 | Ala | 8.01 | 125.3 | 53.3 |
| 48 | Val | 8.00 | 118.6 | 62.9 | 48 | Val | 8.15 | 118.6 | 65.5 | 48 | Val | 7.94 | 117.7 | 63.0 |
| 49 | Cys | 8.27 | 122.0 | 59.0 | 49 | Cys | MR   | MR    | 58.7 | 49 | Ser | 8.14 | 118.0 | 58.8 |
| 50 | Ala | 8.33 | 125.9 | 53.0 | 50 | Ala | 7.93 | 118.9 | 54.4 | 50 | Ala | 8.20 | 125.3 | 53.0 |
| 51 | Thr | 7.97 | 112.1 | 61.9 | 51 | Thr | 7.50 | 107.9 | 63.4 | 51 | Thr | 7.97 | 111.7 | 61.9 |
| 52 | Asn | 8.28 | 121.4 | 51.2 | 52 | Asn | MR   | MR    | MR   | 52 | Asn | 8.27 | 121.5 | 51.2 |
| 53 | Pro | NA   | NA    | 64.0 | 53 | Pro | NA   | NA    | 65.3 | 53 | Pro | NA   | NA    | 63.7 |
| 54 | Ala | 8.13 | 122.0 | 52.8 | 54 | Ala | 8.13 | 119.9 | 55.1 | 54 | Ala | 8.17 | 122.4 | 52.7 |
| 55 | Ala | 7.95 | 122.0 | 52.8 | 55 | Ala | 7.59 | 120.5 | 53.7 | 55 | Ala | 7.99 | 122.3 | 52.7 |
| 56 | Cys | 8.09 | 117.9 | 58.9 | 56 | Cys | 7.89 | 117.3 | 58.0 | 56 | Ser | 8.11 | 114.5 | 58.6 |
| 57 | Lys | 8.30 | 123.4 | 57.0 | 57 | Lys | 8.07 | 119.9 | 58.5 | 57 | Lys | 8.28 | 123.0 | 56.7 |
| 58 | Glu | 8.44 | 121.3 | 57.0 | 58 | Glu | 7.89 | 119.4 | 58.4 | 58 | Glu | 8.29 | 121.1 | 56.9 |
| 59 | Lys | 8.14 | 121.2 | 56.5 | 59 | Lys | 7.86 | 118.0 | 57.8 | 59 | Lys | 8.16 | 121.4 | 56.4 |
| 60 | Phe | 8.24 | 120.4 | 57.8 | 60 | Phe | 8.18 | 115.9 | 58.0 | 60 | Phe | 8.23 | 120.6 | 57.9 |
| 61 | Gly | 8.25 | 109.8 | 45.4 | 61 | Gly | 7.90 | 109.1 | 45.1 | 61 | Gly | 8.25 | 109.8 | 45.4 |
| 62 | Asp | 8.17 | 120.3 | 54.3 | 62 | Asp | 8.29 | 120.3 | 56.4 | 62 | Asp | 8.18 | 120.4 | 54.2 |
| 63 | Ile | 8.07 | 121.6 | 59.7 | 63 | Ile | MR   | MR    | MR   | 63 | Ile | 8.07 | 121.7 | 59.7 |
| 64 | Pro | NA   | NA    | 63.6 | 64 | Pro | NA   | NA    | MR   | 64 | Pro | NA   | NA    | 63.5 |
| 65 | Ala | 8.27 | 123.5 | 53.5 | 65 | Ala | MR   | MR    | 54.4 | 65 | Ala | 8.28 | 123.6 | 53.4 |
| 66 | Lys | 8.44 | 119.1 | 58.6 | 66 | Lys | 8.39 | 118.3 | 59.6 | 66 | Lys | 8.44 | 119.2 | 58.5 |
| 67 | Gly | 8.43 | 107.0 | 46.8 | 67 | Gly | 8.30 | 106.0 | 47.0 | 67 | Gly | 8.43 | 107.1 | 46.6 |
| 68 | Met | MR   | MR    | 57.7 | 68 | Met | 7.83 | 120.8 | 56.4 | 68 | Met | 7.88 | 120.3 | 56.8 |
| 69 | Leu | 7.87 | 120.7 | 57.3 | 69 | Leu | 8.55 | 120.2 | 53.3 | 69 | Leu | 8.23 | 119.0 | 53.1 |
| 70 | Val | 7.96 | 119.7 | 66.3 | 70 | Val | MR   | MR    | 62.5 | 70 | Val | MR   | MR    | 62.6 |
| 71 | Arg | 8.05 | 120.3 | 58.8 | 71 | Arg | 8.59 | 125.0 | 56.5 | 71 | Arg | 8.65 | 123.5 | 56.8 |
| 72 | Glu | 7.98 | 118.2 | 59.2 | 72 | Glu | MR   | MR    | 59.6 | 72 | Glu | 7.98 | 118.2 | 59.1 |
| 73 | Ala | 7.65 | 121.9 | 54.9 | 73 | Ala | 7.57 | 121.3 | 54.9 | 73 | Ala | 7.67 | 122.0 | 54.9 |
| 74 | Ile | 8.19 | 117.1 | 64.5 | 74 | Ile | 8.25 | 116.9 | 64.7 | 74 | Ile | 8.18 | 117.2 | 64.6 |
| 75 | Asp | 8.26 | 120.9 | 57.6 | 75 | Asp | 8.29 | 121.0 | 57.6 | 75 | Asp | MR   | MR    | 57.5 |
| 76 | Arg | 7.71 | 117.3 | 58.6 | 76 | Arg | 7.74 | 117.5 | 58.6 | 76 | Arg | 7.73 | 117.5 | 58.5 |
| 77 | Val | 7.66 | 115.7 | 64.1 | 77 | Val | 7.71 | 115.8 | 64.2 | 77 | Val | 7.69 | 116.0 | 64.2 |
| 78 | Leu | 8.21 | 118.8 | 55.3 | 78 | Leu | 8.25 | 118.5 | 55.3 | 78 | Leu | MR   | MR    | 55.3 |
| 79 | Gly | 7.95 | 107.0 | 45.7 | 79 | Gly | 7.93 | 107.0 | 45.7 | 79 | Gly | 7.96 | 107.2 | 45.7 |

|     |     |      |       |      |     |     |      |       |      |     |     |      |       |      |
|-----|-----|------|-------|------|-----|-----|------|-------|------|-----|-----|------|-------|------|
| 80  | Thr | 8.29 | 111.7 | 62.4 | 80  | Thr | 8.31 | 111.7 | 62.3 | 80  | Thr | 8.29 | 111.7 | 62.3 |
| 81  | Asp | 8.52 | 120.7 | 55.2 | 81  | Asp | 8.53 | 120.7 | 55.3 | 81  | Asp | 8.52 | 120.8 | 55.1 |
| 82  | Val | 7.05 | 118.4 | 59.2 | 82  | Val | 7.01 | 118.2 | 59.2 | 82  | Val | 7.09 | 118.4 | 59.1 |
| 83  | Pro | NA   | NA    | MR   | 83  | Pro | NA   | NA    | MR   | 83  | Pro | NA   | NA    | MR   |
| 84  | Ser | MR   | MR    | MR   | 84  | Ser | MR   | MR    | MR   | 84  | Ser | MR   | MR    | MR   |
| 85  | Ala | MR   | MR    | 55.3 | 85  | Ala | 8.90 | 121.9 | 55.4 | 85  | Ala | MR   | MR    | MR   |
| 86  | Met | 7.03 | 116.9 | 58.3 | 86  | Met | 7.01 | 116.9 | 58.3 | 86  | Met | MR   | MR    | MR   |
| 87  | Lys | 7.76 | 119.0 | 60.5 | 87  | Lys | 7.74 | 118.9 | 60.5 | 87  | Lys | 8.52 | 118.7 | MR   |
| 88  | Asn | 8.53 | 118.7 | 55.9 | 88  | Asn | 8.55 | 118.8 | 55.9 | 88  | Asn | 8.52 | 118.7 | 55.8 |
| 89  | Asp | 7.89 | 122.3 | 57.8 | 89  | Asp | 7.87 | 122.4 | 57.8 | 89  | Asp | 7.92 | 122.3 | 57.6 |
| 90  | Met | 8.57 | 118.6 | 59.6 | 90  | Met | 8.55 | 118.5 | 59.5 | 90  | Met | 8.55 | 118.7 | 59.4 |
| 91  | Ser | 8.09 | 114.2 | 62.5 | 91  | Ser | 8.10 | 114.3 | 62.7 | 91  | Ser | 8.10 | 114.3 | 62.0 |
| 92  | Ser | 7.89 | 117.7 | 61.5 | 92  | Ser | 7.85 | 117.5 | 61.4 | 92  | Ser | 7.91 | 117.7 | 61.6 |
| 93  | Leu | 8.08 | 123.2 | 58.2 | 93  | Leu | 8.04 | 123.1 | 58.2 | 93  | Leu | 8.08 | 123.3 | 58.1 |
| 94  | Leu | 8.18 | 118.4 | 57.7 | 94  | Leu | 8.20 | 118.3 | 57.8 | 94  | Leu | 8.17 | 118.5 | 57.7 |
| 95  | Ala | 8.20 | 119.6 | 55.5 | 95  | Ala | 8.22 | 119.6 | 55.5 | 95  | Ala | 8.17 | 119.7 | 55.4 |
| 96  | Gln | 7.96 | 115.9 | 58.5 | 96  | Gln | 7.89 | 115.3 | 58.8 | 96  | Gln | 7.97 | 116.0 | 58.0 |
| 97  | Gln | 7.96 | 119.2 | 58.4 | 97  | Gln | 7.96 | 119.1 | 58.1 | 97  | Gln | 7.98 | 119.4 | 58.5 |
| 98  | Ile | 8.16 | 118.9 | 64.1 | 98  | Ile | 8.11 | 118.9 | 63.9 | 98  | Ile | 8.16 | 119.0 | 64.0 |
| 99  | Glu | 7.84 | 120.1 | 58.2 | 99  | Glu | 7.86 | 120.4 | 57.9 | 99  | Glu | 7.87 | 120.3 | 58.2 |
| 100 | Ala | 7.75 | 120.7 | 53.4 | 100 | Ala | 7.80 | 121.1 | 53.4 | 100 | Ala | 7.77 | 120.8 | 53.4 |
| 101 | Glu | 8.26 | 115.8 | 56.8 | 101 | Glu | 8.28 | 116.3 | 56.9 | 101 | Glu | 8.27 | 116.0 | 56.9 |
| 102 | Gly | 8.22 | 109.7 | 45.7 | 102 | Gly | 8.23 | 109.7 | 45.6 | 102 | Gly | 8.23 | 109.8 | 45.7 |
| 103 | Val | 7.82 | 119.3 | 62.1 | 103 | Val | 7.85 | 119.2 | 62.3 | 103 | Val | 7.84 | 119.4 | 62.3 |
| 104 | Val | 7.93 | 123.5 | 61.1 | 104 | Val | 7.94 | 123.2 | 61.4 | 104 | Val | 7.95 | 123.5 | 61.2 |
| 105 | Thr | 8.14 | 114.0 | 60.5 | 105 | Thr | 8.08 | 113.6 | 61.3 | 105 | Thr | 8.14 | 114.0 | 60.6 |
| 106 | Ser | 9.02 | 117.6 | 62.2 | 106 | Ser | 8.96 | 117.6 | 61.6 | 106 | Ser | 9.01 | 117.6 | MR   |
| 107 | Thr | 7.88 | 116.8 | 65.7 | 107 | Thr | 7.95 | 117.1 | 65.6 | 107 | Thr | 7.91 | 116.8 | 65.6 |
| 108 | Glu | 7.78 | 122.8 | 59.0 | 108 | Glu | 7.84 | 122.8 | 59.0 | 108 | Glu | 7.81 | 122.8 | 59.0 |
| 109 | Phe | 8.43 | 120.8 | 60.1 | 109 | Phe | 8.39 | 120.8 | 60.1 | 109 | Phe | 8.41 | 120.8 | 60.0 |
| 110 | Ala | 8.66 | 120.3 | 55.7 | 110 | Ala | 8.63 | 120.4 | 55.7 | 110 | Ala | 8.65 | 120.5 | 55.6 |
| 111 | Ser | 7.74 | 113.4 | 61.6 | 111 | Ser | 7.79 | 113.4 | 61.7 | 111 | Ser | 7.77 | 113.4 | 61.7 |
| 112 | Gln | 7.82 | 121.3 | 59.1 | 112 | Gln | 7.83 | 121.3 | 59.0 | 112 | Gln | 7.83 | 121.3 | 58.9 |
| 113 | Leu | 8.15 | 118.8 | 57.8 | 113 | Leu | 8.15 | 118.7 | 57.8 | 113 | Leu | 8.15 | 118.8 | 57.8 |
| 114 | Gln | 8.05 | 118.2 | 59.7 | 114 | Gln | 8.06 | 118.3 | 59.7 | 114 | Gln | 8.05 | 118.3 | 59.6 |
| 115 | Asn | 7.98 | 116.3 | 55.9 | 115 | Asn | 8.02 | 116.3 | 55.9 | 115 | Asn | 8.03 | 116.4 | 55.9 |
| 116 | Arg | 8.31 | 117.8 | 58.3 | 116 | Arg | 8.30 | 117.7 | 58.3 | 116 | Arg | 8.32 | 117.7 | 58.2 |
| 117 | Tyr | 7.52 | 112.2 | 57.2 | 117 | Tyr | 7.51 | 112.2 | 57.3 | 117 | Tyr | 7.52 | 112.5 | 57.3 |
| 118 | Gly | 7.79 | 108.7 | 46.8 | 118 | Gly | 7.80 | 108.7 | 46.8 | 118 | Gly | 7.80 | 108.8 | 46.6 |
| 119 | Ile | 6.65 | 113.2 | 60.1 | 119 | Ile | 6.64 | 113.2 | 60.1 | 119 | Ile | MR   | MR    | 60.1 |
| 120 | Asp | 8.34 | 121.9 | 54.1 | 120 | Asp | 8.39 | 121.9 | 54.1 | 120 | Asp | 8.38 | 122.1 | 54.2 |



|     |     |      |       |      |     |     |      |       |      |     |     |      |       |      |
|-----|-----|------|-------|------|-----|-----|------|-------|------|-----|-----|------|-------|------|
| 121 | Lys | 8.42 | 121.4 | 60.2 | 121 | Lys | 8.43 | 121.3 | 60.2 | 121 | Lys | 8.42 | 121.4 | 60.2 |
| 122 | Gln | 8.29 | 117.7 | 59.2 | 122 | Gln | 8.29 | 117.6 | 59.3 | 122 | Gln | 8.29 | 117.6 | 59.3 |
| 123 | Gln | 8.03 | 119.1 | 58.6 | 123 | Gln | 8.04 | 119.1 | 58.5 | 123 | Gln | 8.05 | 119.2 | 58.5 |
| 124 | Ala | 8.61 | 121.0 | 55.5 | 124 | Ala | 8.62 | 120.9 | 55.5 | 124 | Ala | 8.63 | 121.1 | 55.5 |
| 125 | Glu | 8.09 | 117.2 | 60.1 | 125 | Glu | 8.08 | 117.2 | 60.0 | 125 | Glu | 8.08 | 117.3 | 60.0 |
| 126 | Ile | 7.59 | 119.2 | 64.9 | 126 | Ile | 7.61 | 119.2 | 64.9 | 126 | Ile | 7.59 | 119.2 | 64.7 |
| 127 | Leu | 8.26 | 120.4 | 57.8 | 127 | Leu | MR   | MR    | 57.9 | 127 | Leu | 8.29 | 120.5 | 57.8 |
| 128 | Ala | 8.50 | 120.4 | 55.8 | 128 | Ala | 8.48 | 120.4 | 55.8 | 128 | Ala | 8.49 | 120.5 | 55.7 |
| 129 | Val | 8.05 | 116.3 | 66.4 | 129 | Val | 8.03 | 116.2 | 66.4 | 129 | Val | 8.02 | 116.4 | 66.4 |
| 130 | Ala | 7.92 | 123.1 | 54.8 | 130 | Ala | 7.96 | 123.2 | 54.8 | 130 | Ala | 7.94 | 123.1 | 54.7 |
| 131 | Ala | 8.70 | 120.1 | 55.1 | 131 | Ala | 8.72 | 120.2 | 55.2 | 131 | Ala | 8.69 | 120.2 | 55.1 |
| 132 | Leu | 8.27 | 116.2 | 57.3 | 132 | Leu | 8.24 | 116.2 | 57.3 | 132 | Leu | 8.23 | 116.3 | 57.2 |
| 133 | Gly | 8.15 | 107.5 | 46.6 | 133 | Gly | 8.18 | 107.6 | 46.6 | 133 | Gly | 8.16 | 107.6 | 46.5 |
| 134 | Ala | 7.65 | 122.3 | 53.7 | 134 | Ala | 7.67 | 122.4 | 53.5 | 134 | Ala | 7.67 | 122.3 | 52.8 |
| 135 | Val | 7.54 | 113.0 | 63.4 | 135 | Val | 7.53 | 112.2 | 63.3 | 135 | Val | 8.02 | 118.7 | 63.3 |
| 136 | Thr | 7.94 | 112.9 | 62.9 | 136 | Thr | 7.94 | 112.7 | 62.8 | 136 | Thr | 7.97 | 113.3 | 62.8 |
| 137 | Gly | 8.13 | 110.4 | 45.9 | 137 | Gly | 8.13 | 110.4 | 45.9 | 137 | Gly | 8.16 | 110.4 | 45.9 |
| 138 | Gly | 8.20 | 108.4 | 45.5 | 138 | Gly | 8.24 | 108.4 | 45.5 | 138 | Gly | 8.21 | 108.4 | 45.5 |
| 139 | Met | 8.17 | 119.3 | 55.8 | 139 | Met | 8.18 | 119.3 | 55.7 | 139 | Met | 8.18 | 119.3 | 55.8 |
| 140 | Gly | 8.40 | 109.4 | 45.5 | 140 | Gly | 8.42 | 109.5 | 45.5 | 140 | Gly | 8.41 | 109.5 | 45.4 |
| 141 | Lys | MR   | MR    | 56.3 | 141 | Lys | 8.17 | 120.6 | 56.2 | 141 | Lys | 8.16 | 120.6 | 56.3 |
| 142 | Ser | 8.38 | 116.8 | 58.6 | 142 | Ser | 8.43 | 116.8 | 58.6 | 142 | Ser | 8.39 | 116.8 | 58.6 |
| 143 | Gly | 8.44 | 110.8 | 45.5 | 143 | Gly | 8.45 | 110.8 | 45.5 | 143 | Gly | 8.45 | 110.8 | 45.5 |
| 144 | Thr | 8.07 | 113.3 | 61.9 | 144 | Thr | 8.08 | 113.3 | 61.9 | 144 | Thr | 8.08 | 113.3 | 61.9 |
| 145 | Ser | 8.37 | 118.1 | 58.4 | 145 | Ser | 8.39 | 118.2 | 58.4 | 145 | Ser | 8.38 | 118.1 | 58.4 |
| 146 | Thr | 8.23 | 116.5 | 62.1 | 146 | Thr | 8.24 | 116.5 | 62.2 | 146 | Thr | 8.24 | 116.5 | 62.2 |
| 147 | Val | 8.12 | 122.3 | 62.5 | 147 | Val | 8.13 | 122.3 | 62.5 | 147 | Val | 8.12 | 122.3 | 62.6 |
| 148 | Thr | 8.16 | 118.2 | 62.0 | 148 | Thr | 8.19 | 118.3 | 62.0 | 148 | Thr | 8.17 | 118.2 | 62.1 |
| 149 | Lys | 8.26 | 123.7 | 56.5 | 149 | Lys | 8.27 | 123.7 | 56.5 | 149 | Lys | 8.27 | 123.7 | 56.5 |
| 150 | Asn | 8.42 | 119.8 | 53.4 | 150 | Asn | 8.43 | 119.8 | 53.4 | 150 | Asn | 8.43 | 119.7 | 53.4 |

Resonance assignments in parts per million (ppm)

MR: missing resonance or assignment

NA: not applicable
